# Supplementary material for: Epb41l5 competes with Delta as a substrate for Mib1 to coordinate specification and differentiation of neurons
Source: Oxford University Press journal article supplement (doi:10.1242/dev.138743), 2016-01-01
Supplement: dev138743supp.pdf [file dev138743supp.pdf]

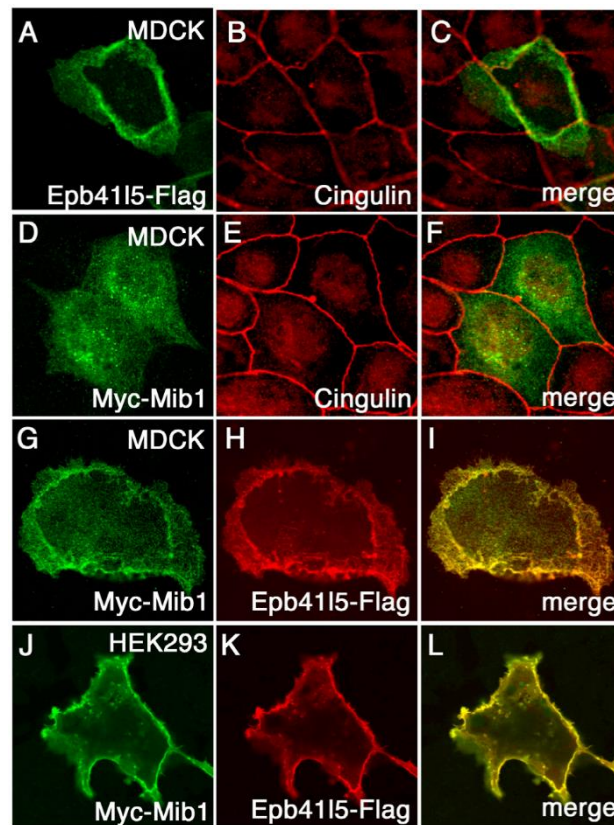

**Fig.S1 Epb41l5 changes subcellular distribution of Mib1**

(A-F) Epb41l5 is a membrane-associated protein and Mib1 is a cytoplasmic protein. Flag-Epb41l5 or Myc-Mib1 was transfected in MDCK cells and their cellular distribution was examined. Cell-to cell junction is labeled by Tight Junction protein, Cingulin. (G-I) Epb41l5 changes cellular distribution of Mib1 from the cytoplasm to the basolateral membrane in MDCK cells. (J-L) Epb41l5 changes cellular distribution of Mib1 from the cytoplasm to the plasma membrane in HEK293 cells.

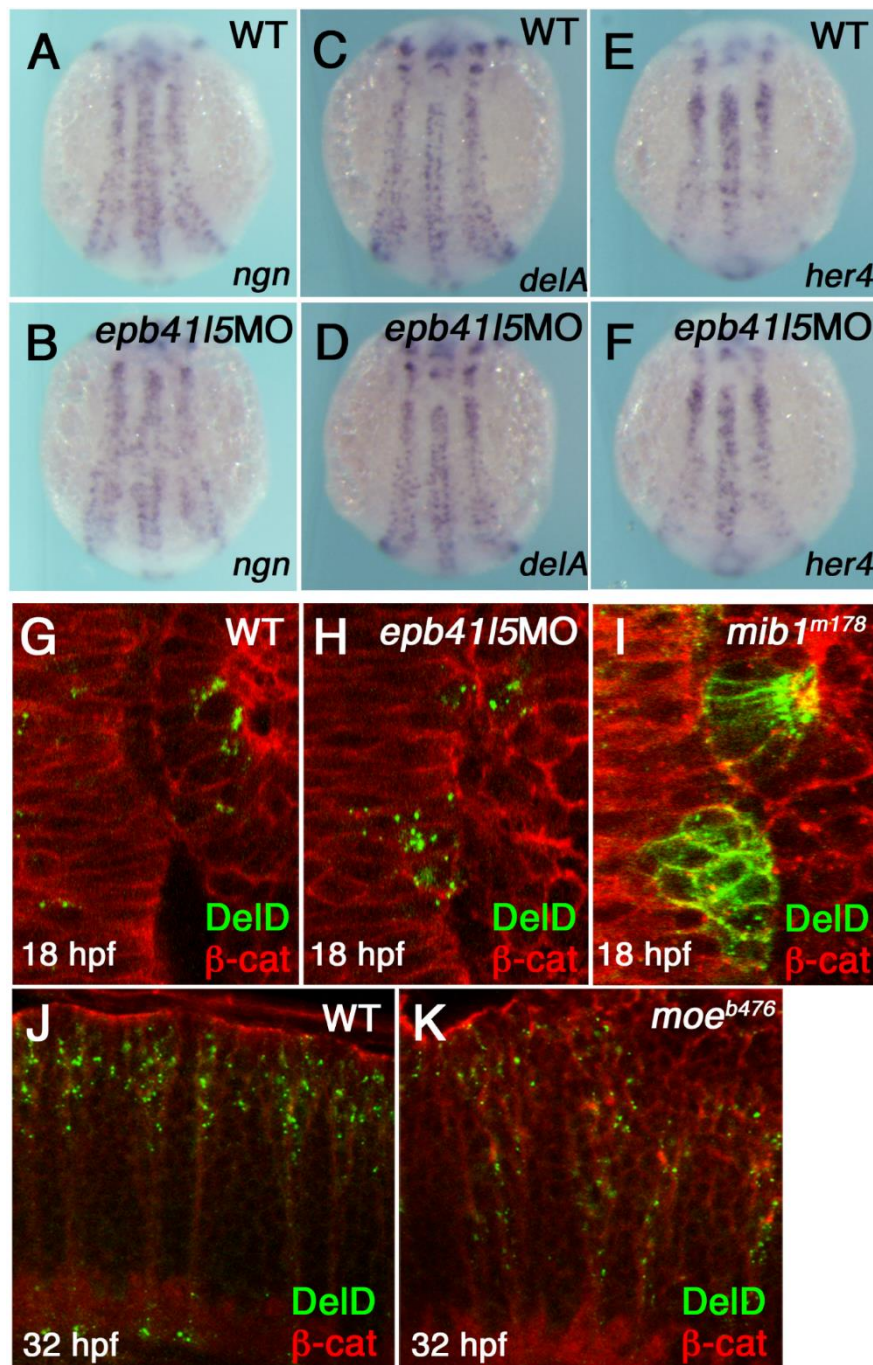

**Fig.S2 Epb4115 does not modify Notch signaling or subcellular distribution of DeltaD in the neuroepithelium.**

(A-F) Reduced expression of *epb4115* does not change fate specification of neurons mediated by Notch-mediated lateral inhibition. *ngn*: bHLH proneural transcription factor, *delta*: Notch ligand, *her4*: direct outcome of Notch signaling. 3-somite stage embryos. (G-I) Reduced expression of Epb4115 does not change subcellular distribution of DeltaD in the hindbrain neuroepithelium. Dorsal views of the 4th rhombomere and the otic placode in 10-somite stage embryos. DeltaD is mainly localized in cytoplasmic puncta in wild-type embryos. DeltaD is mainly localized on the plasma membrane in *mib1*<sup>m178</sup> mutants, confirming that Mib1 facilitates endocytosis of DeltaD in neuroepithelial cells. DeltaD is mainly localized in cytoplasmic puncta in *epb4115* deficient embryos, suggesting that Epb4115 is not essential for Mib1-mediated endocytosis of Delta. (J,K) Loss of Epb4115 does not change subcellular distribution of DeltaD in the hindbrain in *epb4115* mutant *moeb*<sup>b476</sup>. Lateral view of the 4th rhombomere at 32 hpf.

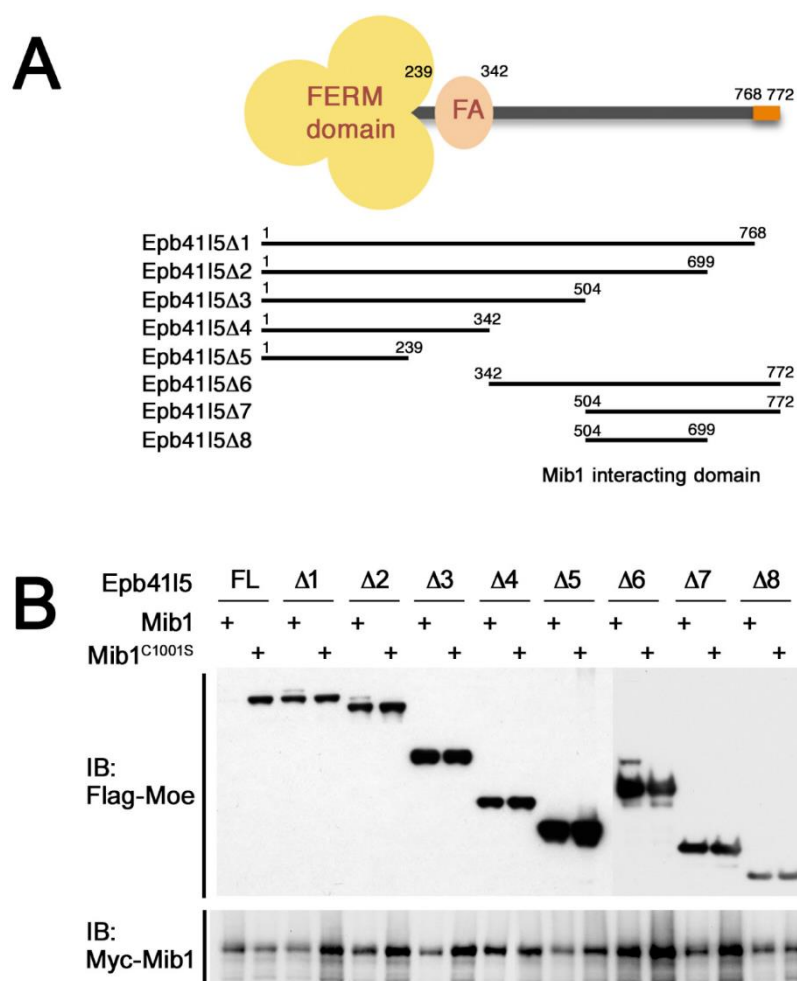

**Fig.S3 The C-terminal PDZ binding domain is required for Mib1-mediated degradation of Epb4115**

(A) Schematic drawing of Epb4115 truncated constructs. (B) The C-terminal PDZ binding domain is required for Mib1-mediated degradation of Epb4115. Mib1 or Mib1<sup>C1001S</sup>, which has a mutation in the Ring finger domain, was coexpressed with various mutant forms of Epb4115. Deletion of four amino acids at the C-terminus of Epb4115 is sufficient to prevent degradation of Epb4115 by Mib1.

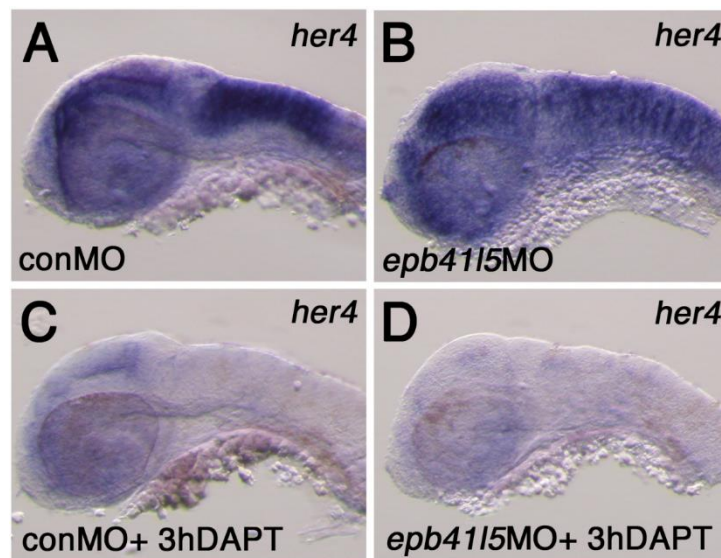

**Fig.S4 Expression of *her4* in the hindbrain of *epb41l5* deficient embryos**

(A,B) Reduced expression of *epb41l5* does not significantly change expression levels of *her4* in *epb41l5* morphants. Lateral view of the hindbrain at 32hpf. (C,D) DAPT treatment effectively reduces *her4* expression in *epb41l5* morphants as in control embryos. Lateral view of the hindbrain at 32hpf.



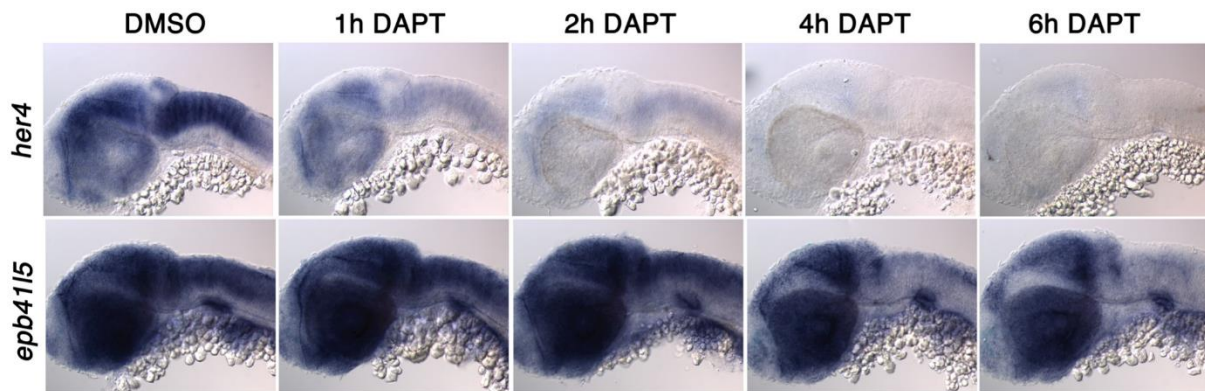

**Fig.S5 Notch signaling changes the numbers of cells expressing *ebp4115***

DAPT reduces expression of *ebp4115* in the hindbrain. Embryos were treated with DAPT for 1, 2, 4 and 6 hours. Lateral view of the hindbrain. 32 hpf

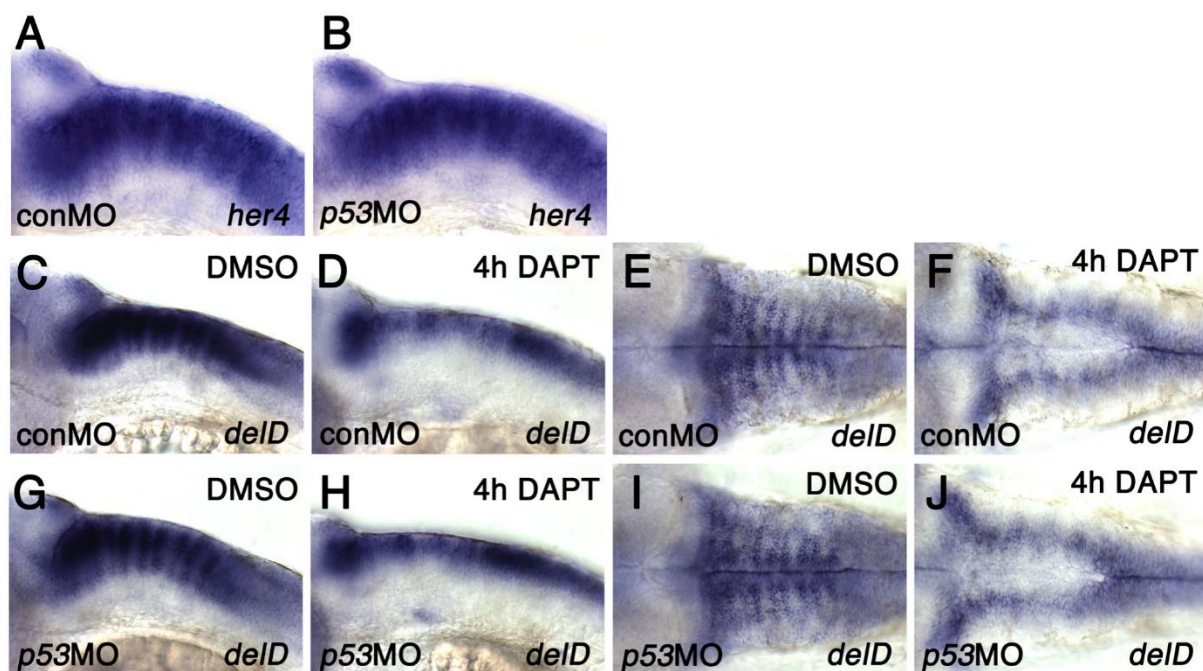

**Fig.S6 Notch signaling changes the numbers of cells expressing *ebp4115***

(A-B) p53 knockdown does not change expression of *her4*, a direct target of Notch signaling at 32 hpf. (C-J) p53 knockdown does not change expression of *deltaD* in DAPT-treated embryos. Lateral views of the hindbrain (C,D,G,H) and dorsal views of the hindbrain (E,F,I,J) at 32 hpf. After 4 hours of DAPT treatment, *deltaD* expression in the hindbrain paraboundary domains is downregulated and the expression is limited to the hindbrain rhombic lip, suggested that DAPT effectively inhibits Notch signaling and facilitates differentiation of DeltaD-positive NPCs determined to become neurons in *p53* deficient embryos.

## Supplemental Table 1

| gene                | sequence                  | Amounts | References          |
|---------------------|---------------------------|---------|---------------------|
| <i>epb41l5</i>      | GAGTCCGGCGTAGGAAGCTCAACAT | 2 ng    | Jensen et al., 2004 |
| <i>p53</i>          | GCGCCATTGCTTTGCAAGAATTG   | 2 ng    | Robu et al., 2007   |
| <i>n-cadherin</i>   | TCTGTATAAAGAAACCGATAGAGTT | 0.1 ng  | Lele et al., 2002   |
| random control 25-N |                           | 2 ng    | Gene Tools          |

## Supplemental Table 2

| Protein          | Catalog # | Host   | Supplier                                | Dilution |
|------------------|-----------|--------|-----------------------------------------|----------|
| DeltaD           | ab73331   | mouse  | AbCam                                   | 1:400    |
| EphA4            |           | rabbit | Dr. David Wilkinson                     | 1:1000   |
| Crb2a            | zs-4      | mouse  | Zebrafish International Resource Center | 1:10     |
| ZO-1             | 33-9100   | mouse  | Invitrogen                              | 1:200    |
| $\beta$ -catenin | C2206     | rabbit | Sigma                                   | 1:500    |
| Cingulin         | PA5-31654 | rabbit | Invitrogen                              | 1:1000   |
| HuC              | A-21271   | mouse  | Invitrogen                              | 1:1000   |
| Flag tag         | F7425     | rabbit | Sigma                                   | 1:1000   |
| Flag tag         | 200471    | mouse  | Agilent Technologies                    | 1:100    |
| Myc tag          | sc-789    | mouse  | Santa Cruz Biotechnology                | 1:500    |
| HA tag           | 901501    | mouse  | BioLegend                               | 1:1000   |
